# Supplementary material
Source: Springer Nature journal article supplement (https://www.springermedizin.de/resource/supplementary/12885_2013_4484_MOESM1_ESM.pdf/9466428)
Supplement: MOESM1 [file 9466428]

|                                                       | <b>Day 1 – Approx 2 hours</b>                                                                                                                                                                                                                                                               | <b>Days 2-6</b>        | <b>Day 7 – approx 15 mins</b>                                  |
|-------------------------------------------------------|---------------------------------------------------------------------------------------------------------------------------------------------------------------------------------------------------------------------------------------------------------------------------------------------|------------------------|----------------------------------------------------------------|
| <b>Baseline assessment</b><br><br>Week -1 to 0        | <ul style="list-style-type: none"> <li>- Consent form and eligibility assessed</li> <li>- LBM,</li> <li>- Body fat%, Wt, Ht, Waist, Hip</li> <li>- QOL related questionnaires</li> <li>- TMill</li> <li>- Handgrip strength</li> <li>- Demographical info</li> <li>- Accel given</li> </ul> | -Fasting CRP and LCn-3 | -Hand in Accel<br><br>- Accel<br>- Squat<br>- Push up<br>- DHQ |
| <b>Mid intervention assessment</b><br><br>Week 12-13  | As above except for consent form<br><br>+<br><br>Pill counts                                                                                                                                                                                                                                |                        |                                                                |
| <b>Post-intervention assessment</b><br><br>Week 25-26 | Same as mid-intervention assessment                                                                                                                                                                                                                                                         |                        |                                                                |
